# Supplementary material for: Mixed-scale poly(methyl methacrylate) channel network-based single-particle manipulation via diffusiophoresis
Source: Royal Society of Chemistry journal article supplement (doi:10.1039/c7nr07669j), 2018-01-01
Supplement: c7nr07669j1.pdf [file c7nr07669j1.pdf]

## SUPPORTING INFORMATION

# Mixed-scale poly(methyl methacrylate) channel network-based single-particle manipulation via diffusiophoresis

*Jisoo Hong<sup>‡</sup>, Beomsang Kim<sup>‡</sup>, and Heungjoo Shin<sup>\*</sup>*

Department of Mechanical Engineering, Ulsan National Institute of Science and Technology  
(UNIST), 50 UNIST-gil, Ulsan 44919, Republic of Korea

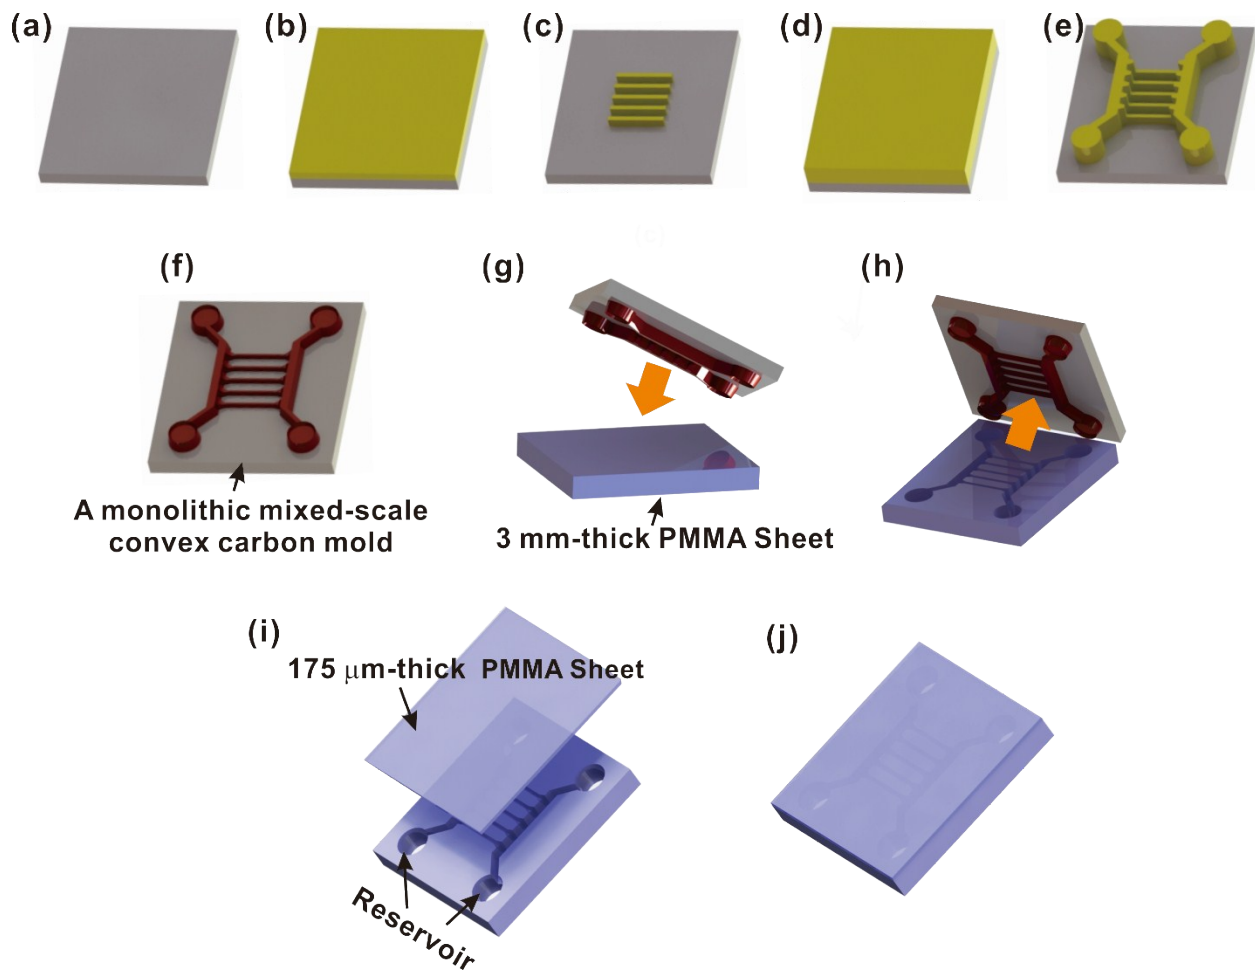

**Fig. S1** Schematic of the fabrication steps used for a PMMA fluidic device consisting of a mixed-scale channel network; (a) Si wafer, (b) thin photoresist coating, (c) 1st photolithography, (d) thick photoresist coating, (e) 2nd photolithography, (f) pyrolysis, (g) hot-embossing, (h) demolding, (i) oxygen plasma treatment, (j) thermal bonding.

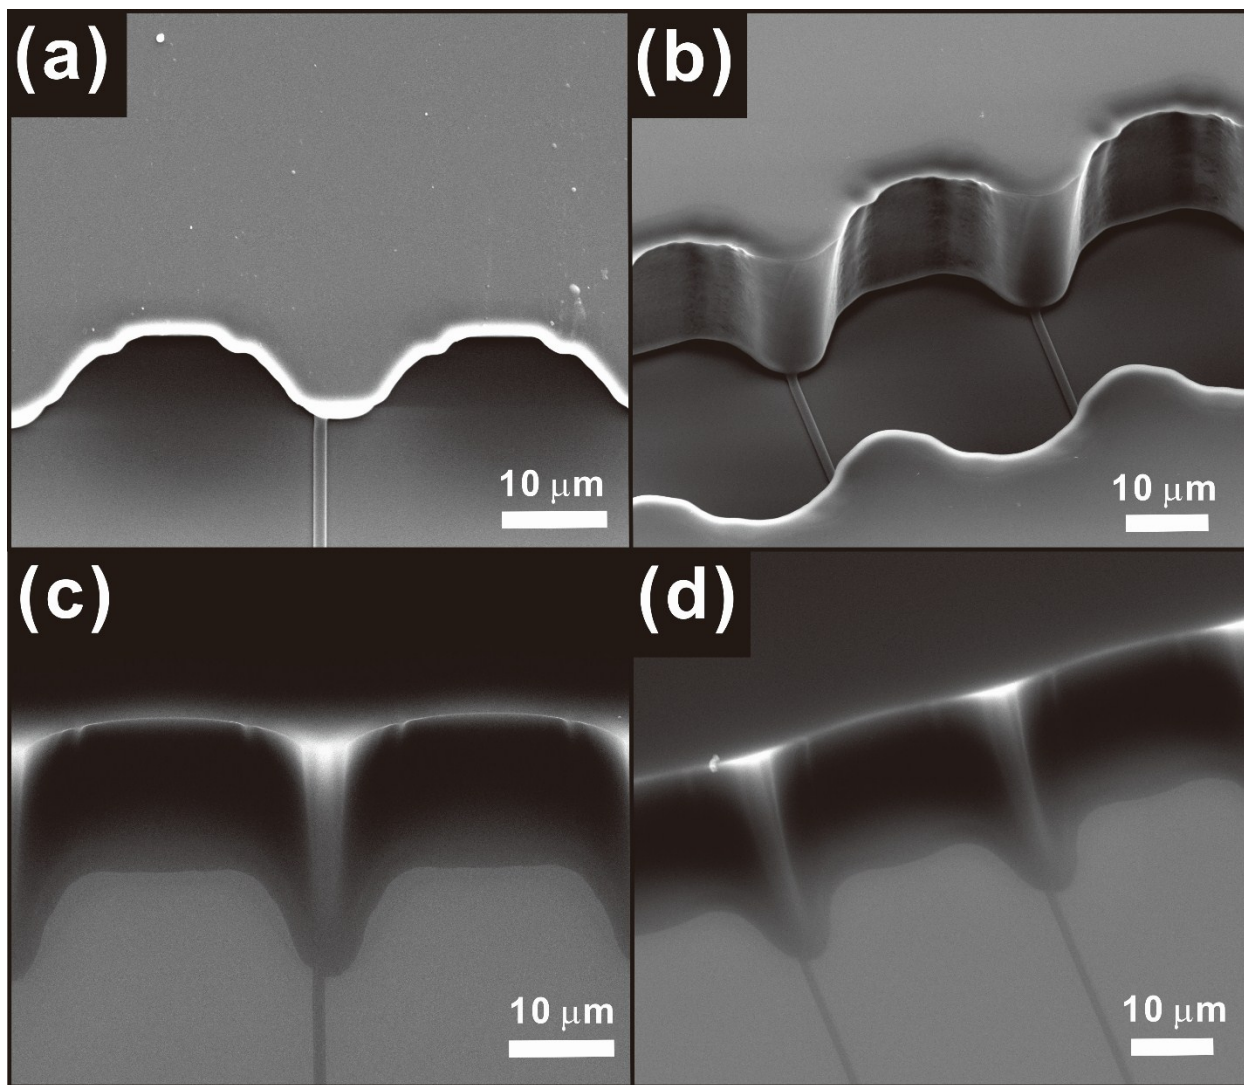

**Fig. S2** Scanning electron microscopy images of (a, b) a SU-8 polymer triangular prism and (c, d) corresponding pyrolyzed Kingfisher-beak-shaped microfunnel carbon stamp.

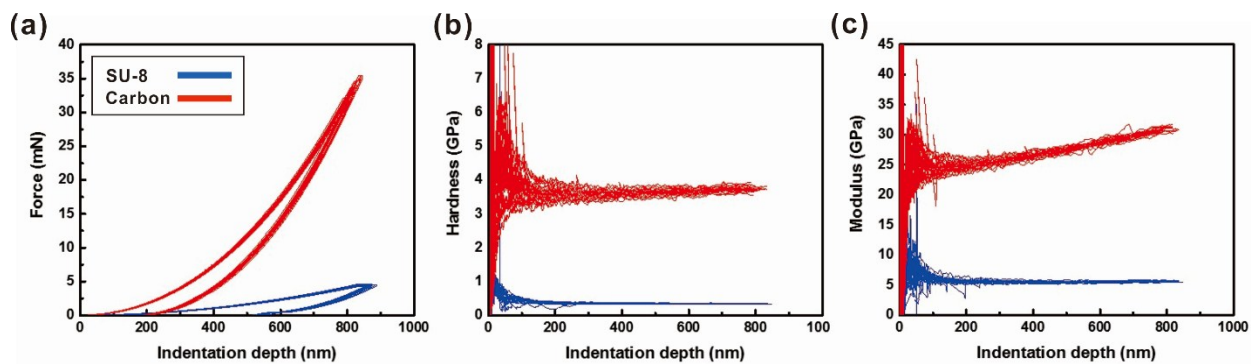

**Fig. S3** Characteristic curves of SU-8 negative photoresist and pyrolyzed carbon obtained using a nanoindenter: (a) Force versus indentation depth, (b) calculated hardness versus indentation depth, and (c) elastic modulus versus indentation depth.

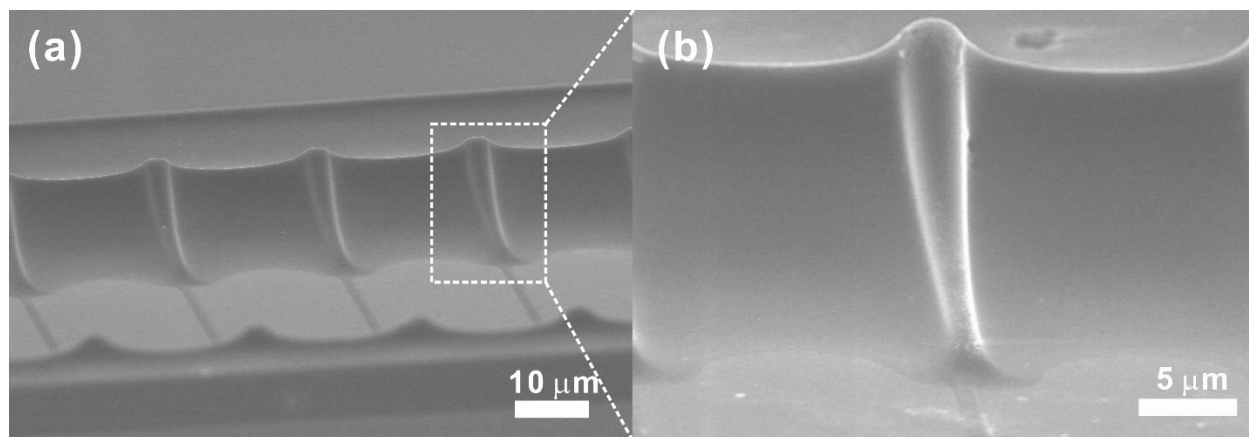

**Fig. S4** SEM images of (a) a mixed-scale carbon stamp and (b) enlarged view of a three-dimensional microfunnel after 50 repeated imprinting processes.

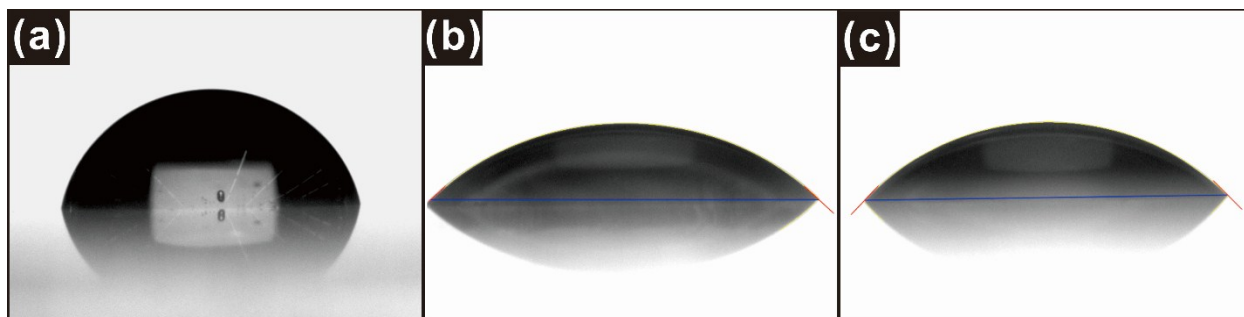

**Fig. S5** Contact angles of distilled water on (a) bare PMMA ( $\sim 74^\circ$ ), (b) oxygen-plasma-treated PMMA ( $\sim 43^\circ$ ), and (c) oxygen-plasma-treated PMMA after heating ( $\sim 45^\circ$ ) under the same conditions as those used in the thermal PMMA bonding process ( $85^\circ\text{C}$  for 3 min).

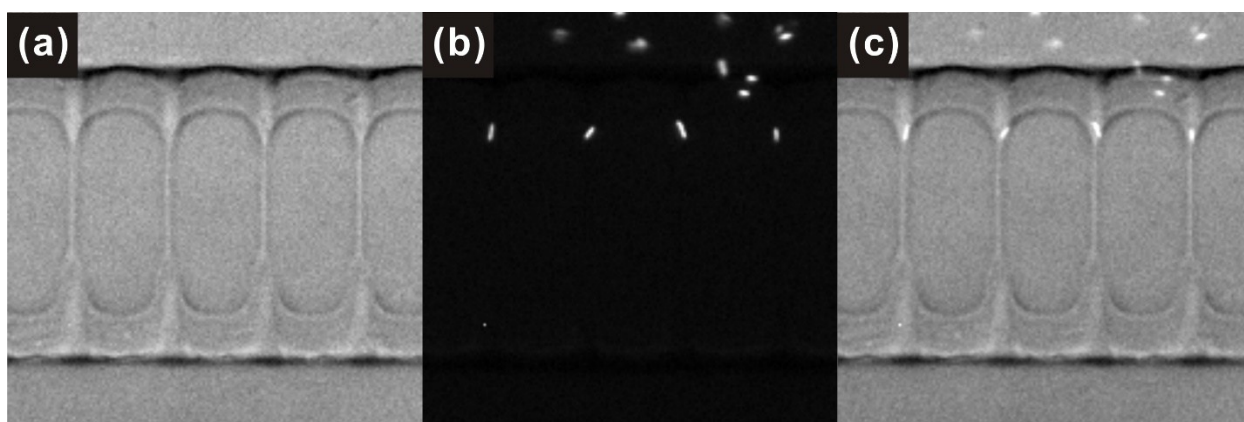

**Fig. S6** Images of diffusiophoresis-based bacterial single-cell entrapment. (a) Optical image, (b) fluorescent image with GFP filter, and (c) overlapped image of the optical and fluorescent images.

**Table S1** Elastic moduli and hardness values of the SU-8 photoresist, pyrolyzed carbon, silicon and polyurethane acrylate (PUA).

|                       | <sup>a</sup> SU-8 | <sup>a</sup> Pyrolyzed carbon | <sup>b</sup> Silicon | <sup>c</sup> PUA |
|-----------------------|-------------------|-------------------------------|----------------------|------------------|
| Elastic modulus (GPa) | 5.5±0.1           | 28.8±0.4                      | 130 - 188            | 2.75             |
| Hardness (GPa)        | 0.35±0.01         | 3.67±0.07                     | 10.2                 | 0.03             |

<sup>a</sup>These values were obtained from nanoindenter experiments.

<sup>b</sup>Referred from Wikipedia ([www.wikipedia.org](http://www.wikipedia.org)).

<sup>c</sup>S. Tanaka, M. Tsutsui, H. Theodore, H. Yuhui, A. Arima, T. Tsuji, K. Doi, S. Kawano, M. Taniguchi, T. Kawai, *Sci. Rep.* 2016, **6**, 31670.
